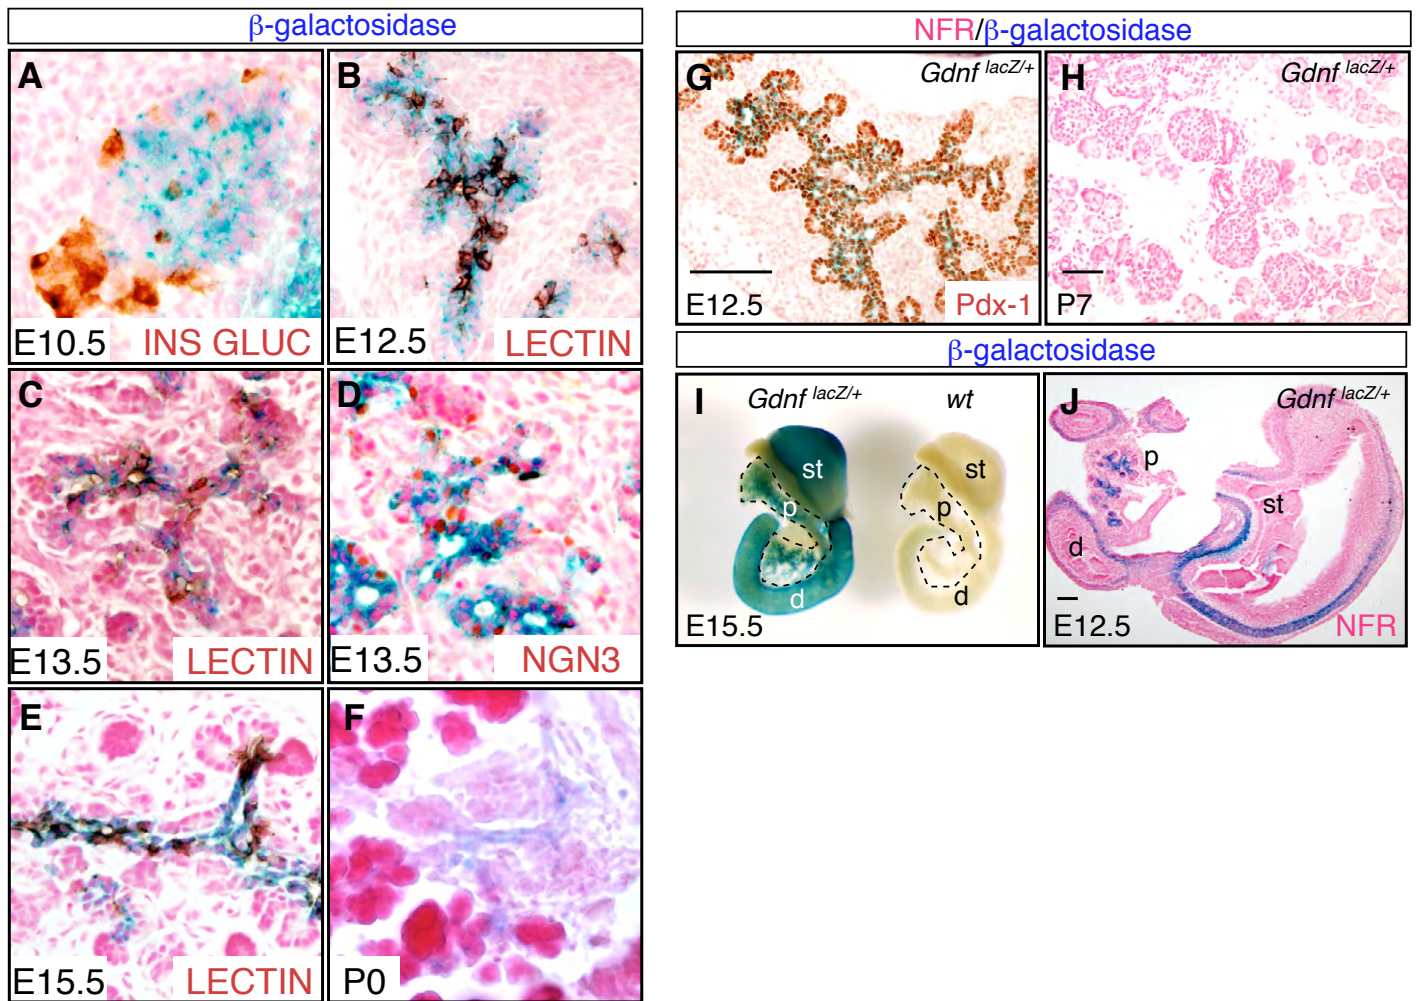

**Fig. S1. *Gdnf* expression in the embryonic pancreas.** (A-F) High-magnification of images shown in Fig. 1. (G)  $\beta$ -galactosidase is broadly expressed in PDX1<sup>+</sup> pancreatic epithelium in *Gdnf*<sup>lacZ/+</sup> mice at E12.5. (H) No  $\beta$ -galactosidase activity is observed in *Gdnf*<sup>lacZ/+</sup> pancreas at P7. (I) Whole-mount detection of  $\beta$ -galactosidase activity in the gastrointestinal tract of *Gdnf*<sup>lacZ/+</sup> (left) and control (right) E15.5 embryos. The pancreas is outlined for better visualization. (J) Paraffin section of E12.5 *Gdnf*<sup>lacZ/+</sup> gut counterstained with Nuclear Fast Red. p, pancreas; st, stomach; d, duodenum. Scale bars: 100  $\mu$ m.

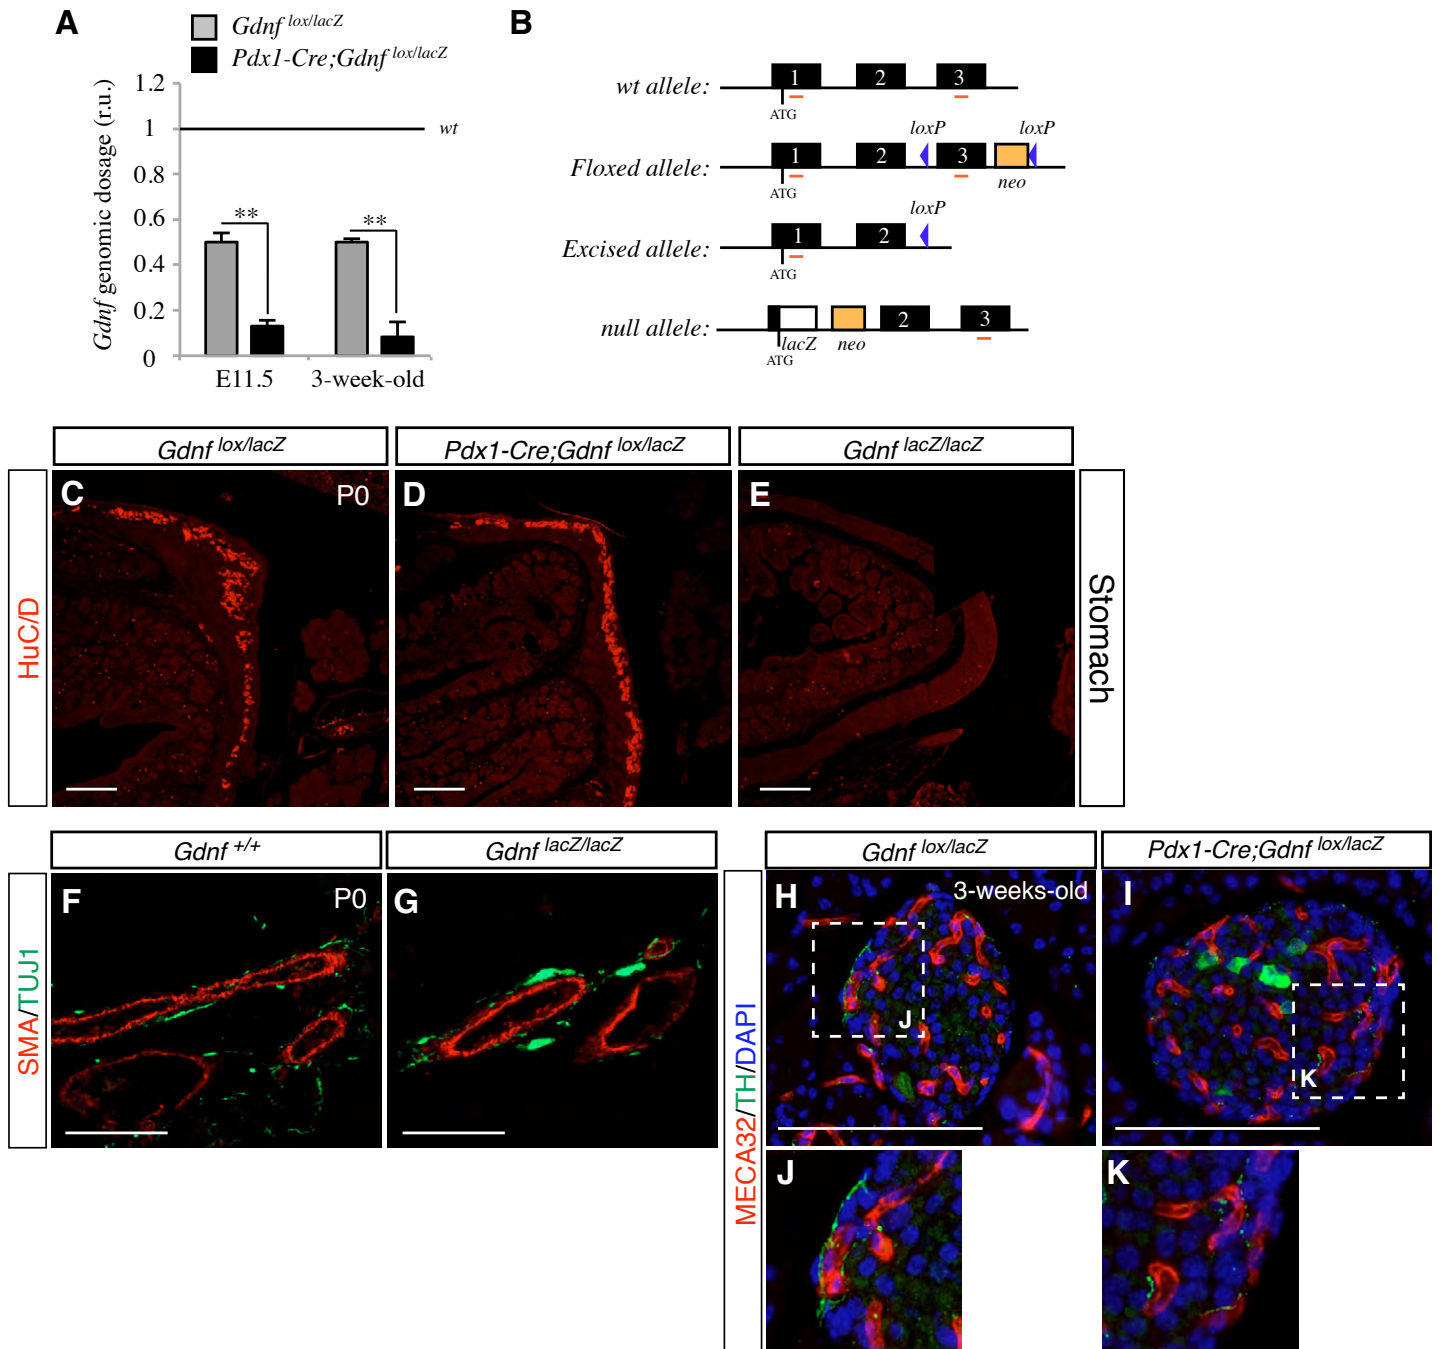

**Fig. S2. Genomic loss of the *Gdnf*<sup>lox</sup> allele and innervation of *Gdnf* mutant mice.** (A) Relative genomic loss of the *Gdnf*<sup>lox</sup> allele in E11.5 and 3-week-old *Pdx1-Cre; Gdnf*<sup>lox/lacZ</sup> pancreata measured by quantitative PCR. The quantification of the excision levels of the *Gdnf*<sup>lox</sup> allele was performed as previously described (Pascual et al., 2008). Data are mean  $\pm$  s.e.m. \*\* $P < 0.01$  (Student's *t*-test). (B) Scheme of wild-type, floxed, excised and *lacZ* *Gdnf* alleles. The positions of the primers used for semi-quantitative RT-PCR in the different alleles are indicated in red. (C-E) HuC/D<sup>+</sup> neuronal cells are found in the stomach of P0 control (C) and *Pdx1-Cre; Gdnf*<sup>lox/lacZ</sup> (D) mice. (E) No neurons are observed in the stomach of P0 *Gdnf*<sup>lacZ/lacZ</sup> mice. (F,G) Most of the remaining nerve fibers in *Gdnf*<sup>lacZ/lacZ</sup> pancreata appeared to be associated with blood vessels, as assessed by smooth muscle immunostaining. (H-K) TH<sup>+</sup> nerve fibers are associated with blood vessels, as assessed by panendothelial cell antigen (Meca 32 clone) staining in control (H,J) and *Pdx1-Cre; Gdnf*<sup>lox/lacZ</sup> (I,K) islets. J and K are higher magnification views of the boxed areas in H and I, respectively. Scale bars: 100  $\mu$ m.

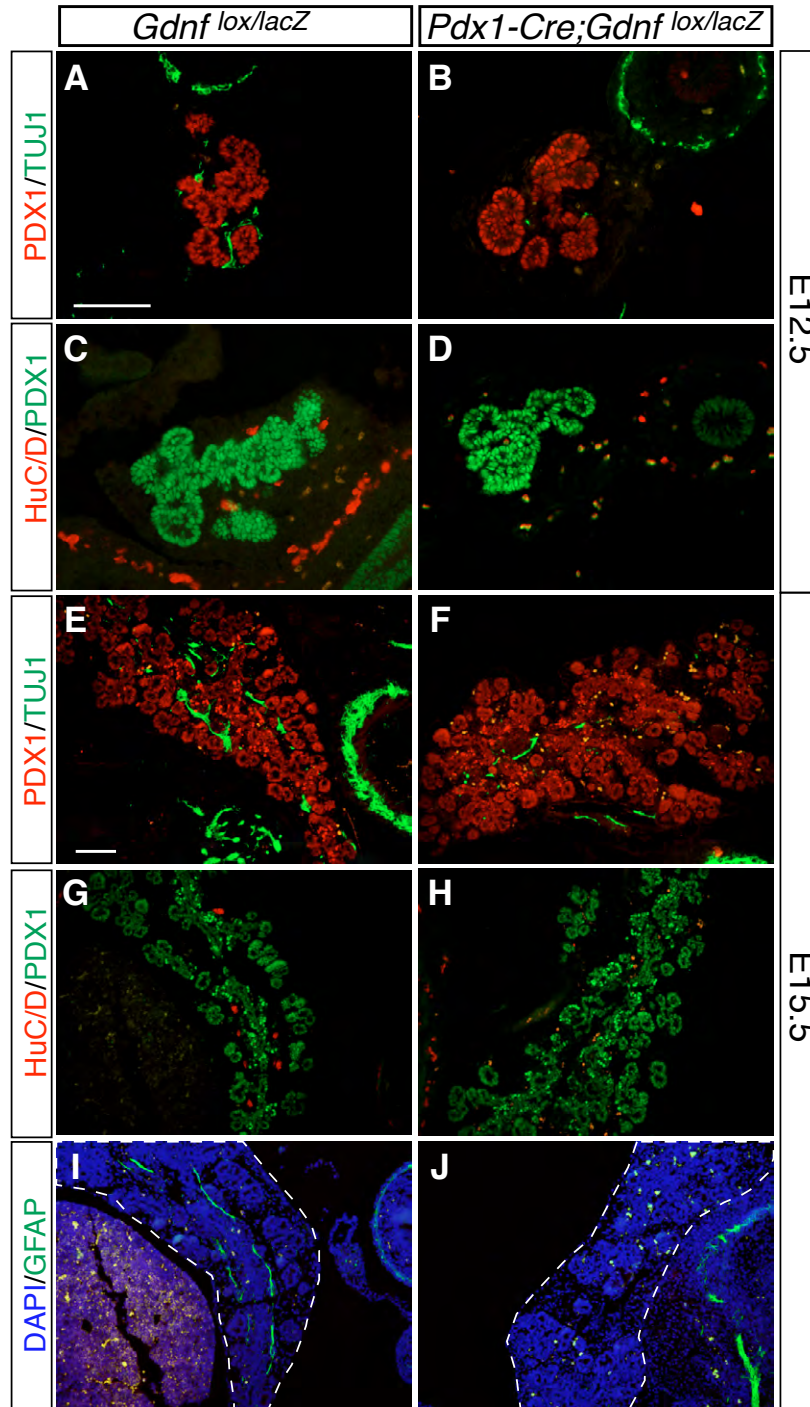

**Fig. S3. Decreased number of NC derivatives in *Gdnf* mutant mouse embryos.** (A-H) E12.5 (A-D) and E15.5 (E-H) paraffin sections of *Pdx1-Cre; Gdnf<sup>lox/lacZ</sup>* and control pancreata immunostained for neural markers TUJ1 (A,B,E,F) and HuC/D (C,D,G,H). (I,J) E15.5 paraffin sections of *Pdx1-Cre; Gdnf<sup>lox/lacZ</sup>* and control pancreata immunostained for the glial marker GFAP. Scale bars: 100  $\mu$ m (in A for A-D; in E for E-J).

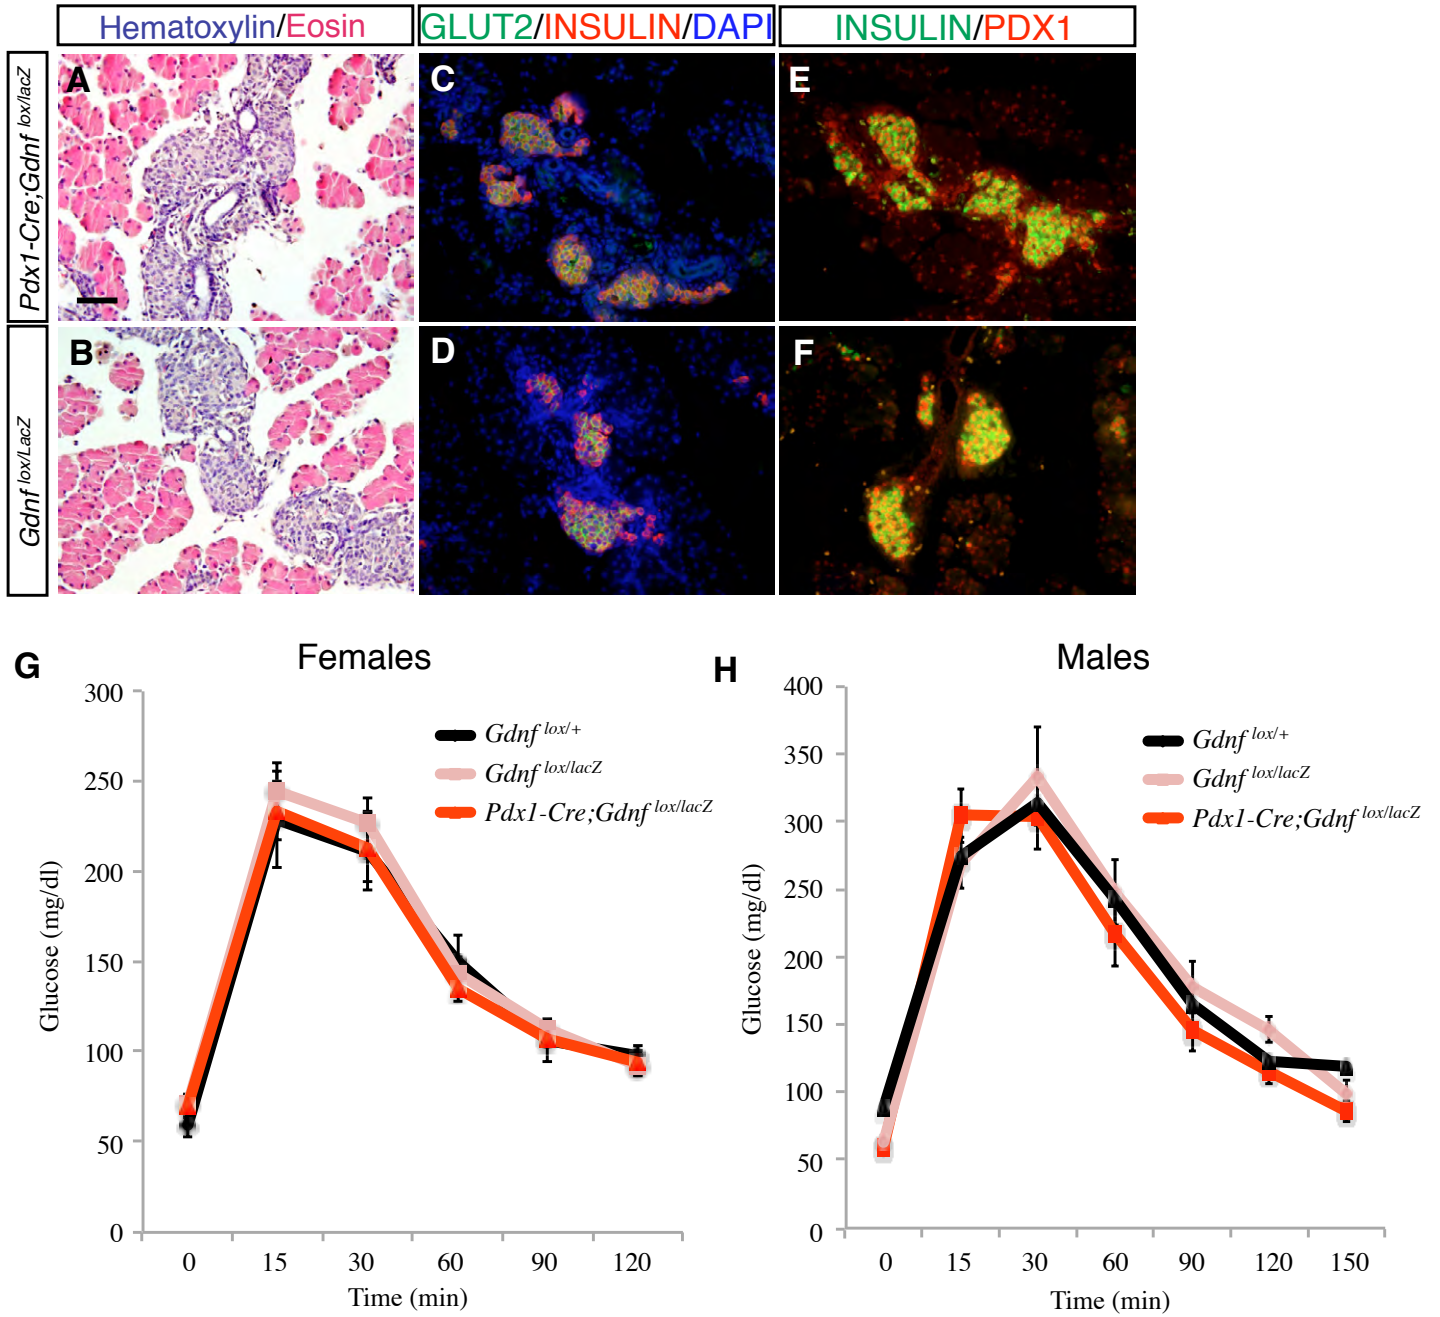

**Fig. S4. Islet formation and  $\beta$ -cell function in adult *Gdnf* mutant mice.** (A,B) Hematoxylin and Eosin staining of control (A) and *Pdx1-Cre; Gdnf<sup>lox/lacZ</sup>* (B) sections of P0 pancreata. (C-F) Immunostaining for mature markers GLUT2 (SLC2A2) (C,D) and PDX1 (E,F) reveals that islet differentiation is not affected in the absence of GDNF. (G,H) Intrapерitoneal glucose tolerance tests performed in 3-month-old female (G) and male (H) mice shows that  $\beta$ -cell function is not affected in *Pdx1-Cre; Gdnf<sup>lox/lacZ</sup>* mice. Scale bars: 50  $\mu$ m (in A for A-F).

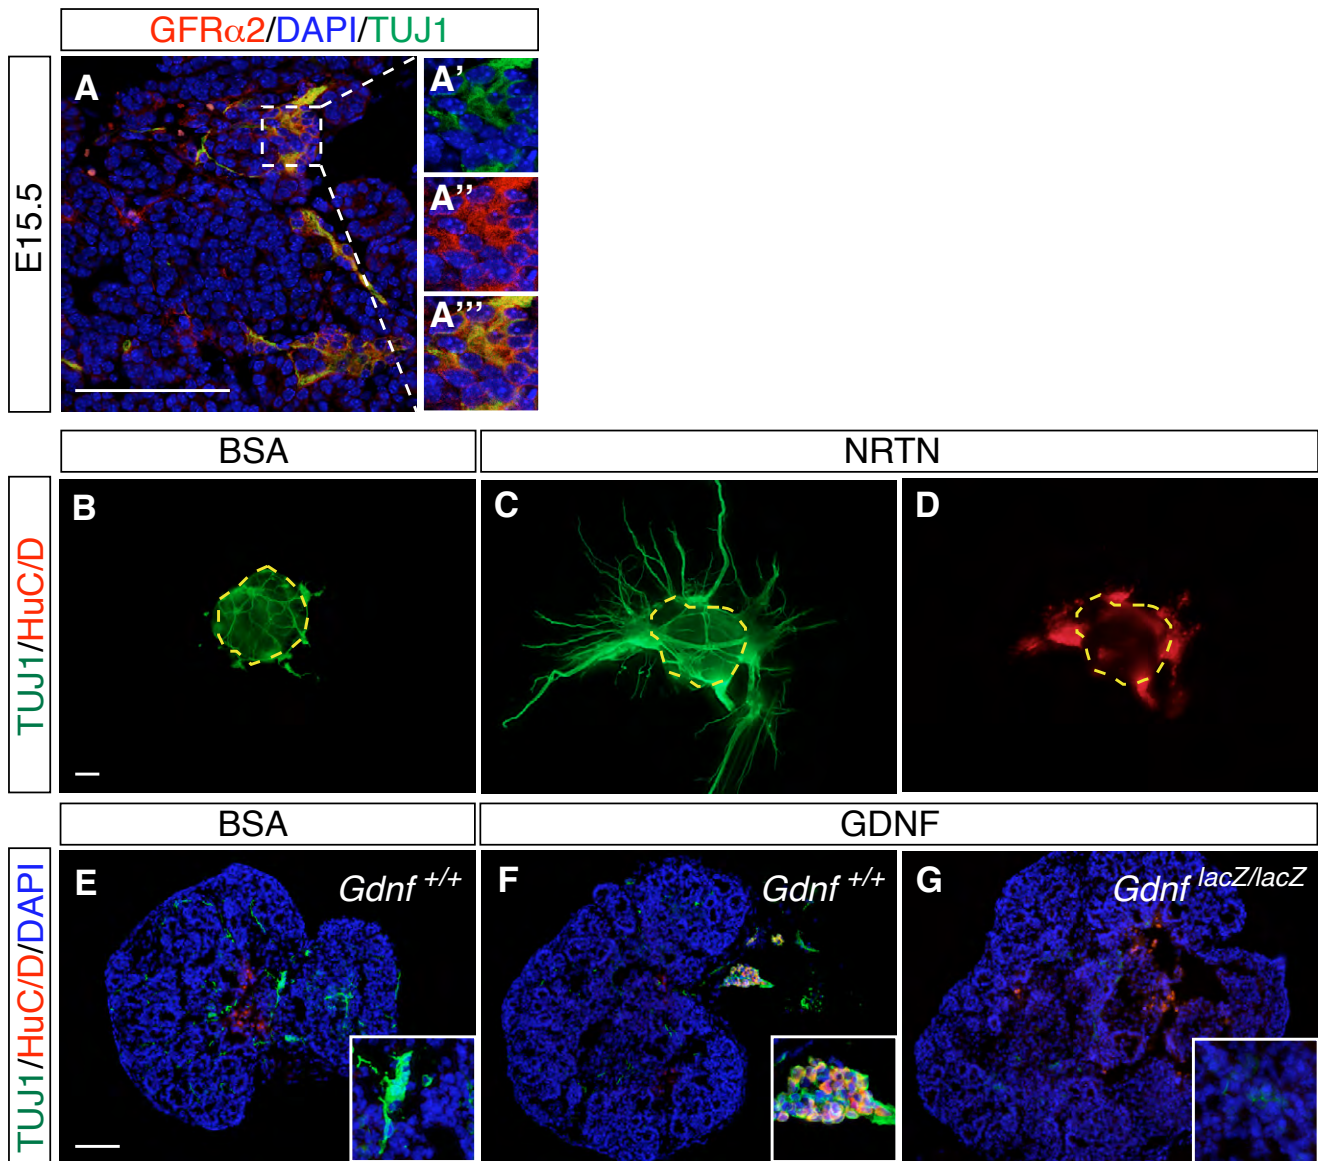

**Fig. S5. Effects of GDNF and NRTN in pancreas explants.** (A-A''') NRTN co-receptor  $GFR\alpha 2$  is expressed in pancreatic neuronal progenitors (marked by TUJ1 reactivity) but not in  $PDX1^+$  epithelial cells. (B-D) E12.5 wild-type pancreatic explants treated with 100 ng/ml NRTN exhibit increased neurite outgrowth (C) and neuronal cells (D) compared with BSA-treated explants (B). (E-G) Sections of pancreatic explants of GDNF-treated control (F) and  $Gdnf^{lacZ/lacZ}$  (G) and BSA-treated control pancreatic explants (E) after 4 days of culture. Note that GDNF does not induce increased neurite outgrowth and neuronal cell differentiation in  $Gdnf^{lacZ/lacZ}$  pancreatic explants. GDNF-treated  $Gdnf^{lacZ/lacZ}$  pancreatic explants display reduced innervation compared with BSA-treated controls. Insets show high-magnification images.  $HUC/D^+$   $TUJ1^-$  cells are autofluorescent red blood cells.

**Table S1. Primer sequences**

| <b>Primer</b>  | <b>Sequence</b>            | <b>Source</b>         |
|----------------|----------------------------|-----------------------|
| CycloA-Fwd     | TCACAGAATTATCCAGGATTCATG   | Puri et al., 2009     |
| CycloA-Rv      | TGCCGCCAGTGCCATT           |                       |
| GDNF_lox-Fwd   | ACTCCAATATGCCTGAAGATTATCCT | Pascual et al., 2008  |
| GDNF_lox-Rv    | TCAGTCTTTTAATGGTGGCTTGAA   |                       |
| GDNF_Ex-Rv     | GAACTCCAGGTAAATAATCC       |                       |
| Gusb-Fwd       | CATTCAGTTCTGGATCAGAAACGTA  | Pascual et al., 2008  |
| Gusb-Rv        | CATGAAGTCGGCGAAATTCC       |                       |
| Neo-Fwd        | GGATGGAAGCCGGTCTTGT        | Pascual et al., 2008  |
| Neo-Rv         | CCTGATGCTCTTCGTCCAGATC     |                       |
| Ngn3-Fwd       | TTTGAGTCGGGAGAAGTAGGATGG   | Mwangi et al., 2010   |
| Ngn3-Rv        | TTGGAACTGAGCACTTCGTGGT     |                       |
| Nkx2.2-Fwd     | CGGGCGGAGAAAGCATT          | Carrasco et al., 2012 |
| Nkx2.2-Rv      | TCCACCTTGCGGACACTATG       |                       |
| Pdx1-Fwd       | CTTAACCTAGGCGTCGCACAA      | Carrasco et al., 2012 |
| Pdx1-Rv        | GAAGCTCAGGGCTGTTTTTCC      |                       |
| E1-E3 GDNF-Fwd | CGGGCCACTTGGAGTTAATG       | This work             |
| E1-E3 GDNF-Rv  | ATGACGTCATCAAACCTGGTC      |                       |

**Table S2. Primary antibodies**

| Antibody                    | Species    | Dilution | Staining           | Source (catalog number)                                   |
|-----------------------------|------------|----------|--------------------|-----------------------------------------------------------|
| $\alpha$ -amylase           | Rabbit     | 1:300    | IF                 | Sigma (A8273)                                             |
| CPA1                        | Rabbit     | 1:1000   | IF, P              | AbD (1810-0006)                                           |
| RET                         | Rabbit     | 1:25     | IF*                | IBL (18121)                                               |
| GFAP                        | Rabbit     | 1:500    | IF                 | DAKO (70334)                                              |
| GFR $\alpha$ 1              | Goat       | 1:50     | IF, P <sup>‡</sup> | R&D Systems (AF560)                                       |
| GFR $\alpha$ 2              | Goat       | 1:100    | IF, P <sup>‡</sup> | R&D Systems (AF429)                                       |
| Glucagon                    | Mouse      | 1:8000   | IF, P              | Sigma (G2654)                                             |
| GLUT2                       | Rabbit     | 1:200    | IF                 | Millipore (07-1402)                                       |
| HuC/D                       | Mouse      | 1:100    | IF*                | Molecular Probes (16A11)                                  |
| Insulin                     | Mouse      | 1:200    | IF                 | Sigma (I2018)                                             |
| Insulin                     | Guinea pig | 1:2000   | IF, P              | Sigma (I8510)                                             |
| KI67                        | Mouse      | 1:100    | IF                 | BD Pharmingen (550609)                                    |
| KI67                        | Rabbit     | 1:200    | IF                 | Thermo Scientific (RM9106-S0)                             |
| Panendothelial cell antigen | Rat        | 1:300    | IF <sup>‡</sup>    | BD Pharmingen (BD 553849)                                 |
| NGN3                        | Mouse      | 1:200    | P                  | Developmental Studies Hybridoma Bank (F25A1B3)            |
| PDX1                        | Guinea pig | 1:200    | IF                 | Abcam (ab7308)                                            |
|                             |            | 1:500    | P                  |                                                           |
| PDX1                        | Mouse      | 1:100    | IF                 | Developmental Studies Hybridoma Bank (F6A11)              |
| pHH3                        | Rabbit     | 1:500    | IF                 | Millipore (06-570)                                        |
| PHOX2B                      | Rabbit     | 1:1000   | IF                 | Gift of J. F. Brunet (Pattyn et al., 1997)                |
| SMA                         | Mouse      | 1:500    | IF                 | Sigma (A2547)                                             |
| SOX10                       | Guinea pig | 1:500    | IF                 | Gift of M. Wegner, Erlangen, Germany (Stolt et al., 2003) |
| SOX10                       | Goat       | 1:200    | IF                 | R&D Systems (AF2864)                                      |
| TH                          | Rabbit     | 1:1000   | IF                 | Novus (NB300-109)                                         |

|       |            |        |    |                    |
|-------|------------|--------|----|--------------------|
| TUJ1  | Rabbit     | 1:1000 | IF | Abcam (ab18207)    |
| VAcHt | Guinea pig | 1:100  | IF | Millipore (AB1588) |

---

P, peroxidase; IF, immunofluorescence.

\*Requires tyramide amplification.

‡Requires biotin-avidin amplification.

---
